# Supplementary material for: Limiting factors for photochemical charge separation in BiVO4/Co3O4, a highly active photocatalyst for water oxidation in sunlight
Source: Royal Society of Chemistry journal article supplement (doi:10.1039/c4ta01654h), 2014-01-01
Supplement: c4ta01654h1.pdf [file c4ta01654h1.pdf]

# Limiting factors for photochemical charge separation in $\text{BiVO}_4/\text{Co}_3\text{O}_4$ , a highly active photocatalyst for water oxidation in sunlight

Jiarui Wang<sup>a</sup> and Frank E. Osterloh<sup>a</sup>

## Electronic Supplementary Information

The synthesis of  $\text{BiVO}_4$  involved a solid-solution reaction and 673 K calcination as described previously.<sup>18</sup> The crystal structures of both uncalcined and calcined  $\text{BiVO}_4$  were verified by powder X-ray diffraction (Figure S1). The XRD patterns agreed well with standard card 00-014-0688 (space group:  $I2/a$ ,  $a = 5.195$ ,  $b = 11.701$ ,  $c = 5.092$ ,  $\beta = 90.38$ ), showing the monoclinic scheelite structure of obtained  $\text{BiVO}_4$ . The monoclinic form is found to be more active under visible light than the tetragonal one.<sup>4,5,8</sup> High activity was noted for  $\text{BiVO}_4$  nanoplates terminated by 001 facets.<sup>6</sup>

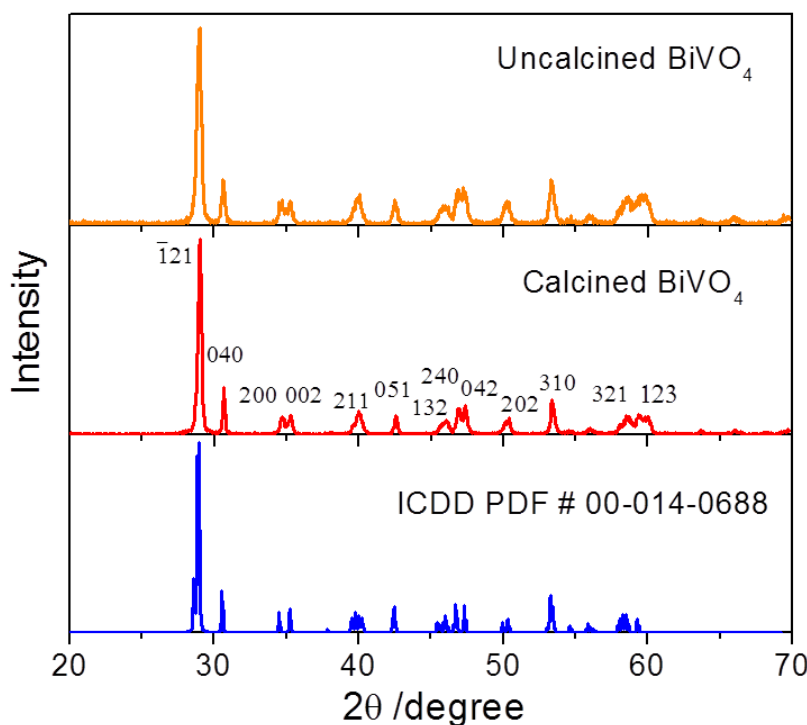

Figure S1. XRD of  $\text{BiVO}_4$  before and after calcining

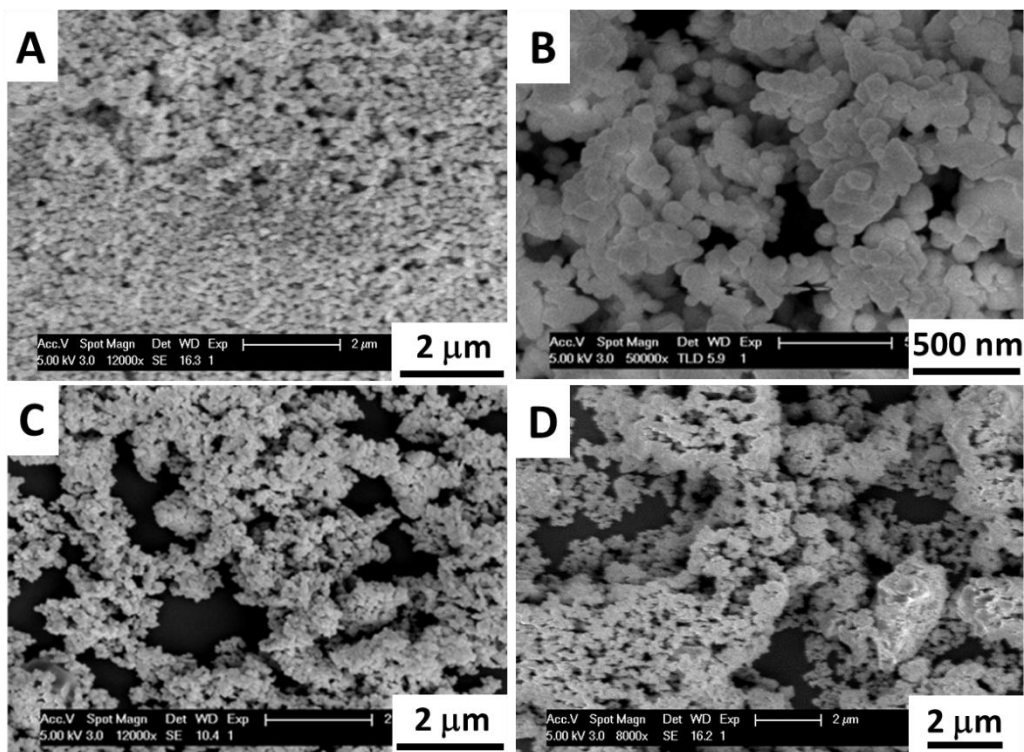

Figure S2. SEM images of  $\text{BiVO}_4$  (A) before and (B) after calcination, (C) Chem- $\text{Co}_3\text{O}_4$ - $\text{BiVO}_4$  and (D) Phys- $\text{Co}_3\text{O}_4$ - $\text{BiVO}_4$

Butler-Ginley calculation of flat-band potentials

1st Ionization Energy:

Oxygen 13.61806 eV, Cobalt 7.8810 eV, Bismuth 7.2856 eV, Vanadium 6.7462eV

David R. Lide (ed), *CRC Handbook of Chemistry and Physics, 84th Edition*. CRC Press. Boca Raton, Florida, 2003; Section 10, Atomic, Molecular, and Optical Physics; Ionization Potentials of Atoms and Atomic Ions

Electron Affinity:

Oxygen 1.4611134(9) eV

Chaibi, W. and Pelaez, R.J. and Blondel, C. and Drag, C. and Delsart, C., *Eur. Phys. J. D58*, 29 (2010)

Bismuth 0.942362(13) eV

Rene C. Bilodeau and Harold K. Haugen, Phys. Rev. A, 2001, 64, 024501

10.1103/PhysRevA.64.024501

Cobalt 0.6633(6) eV

Scheer, M.; Brodie, C.A.; Bilodeau, R.C.; Haugen, H. K. Phys. Rev. A, 2001, 58,205162

Vanadium 0.526(12) eV

Feigerle, C.S., Corderman, R.R., Bobashev, S.V. and Lineberger, W.C. (1981). Binding energies and structure of transition metal negative ions. J. Chem. Phys. 74, 1580 doi:10.1063/1.441289.

Mulliken Electronegativity for BiVO<sub>4</sub>:

$$O = (13.61806 + 1.4611) / 2 = 7.53958$$

$$Co = (0.6634 + 7.8810) / 2 = 4.2722$$

$$Bi = (0.9424 + 7.2856) / 2 = 4.114$$

$$V = (0.5261 + 6.7462) / 2 = 3.63615$$

Mulliken Electronegativity for

$$Co_3O_4 = (7.54^4 * 4.27^3)^{1/7} = 5.9093$$

$$BiVO_4 = (4.114 * 3.63615 * 7.53958^4)^{1/6} = 6.0355$$

$$E_{VB} = X - 4.44 + E_G / 2$$

Co<sub>3</sub>O<sub>4</sub>: O<sup>2-</sup> to Co<sup>2+</sup> 2.2eV O<sup>2-</sup> to Co<sup>3+</sup> 1.6 eV

Co<sub>3</sub>O<sub>4</sub> = 5.91 - 4.44 + 1.6/2 = 5.91 - 4.44 + 0.8 = 2.27 V for BG 1.6eV, +1.03 = 2.5 eV for BG 2.07eV

CB = 0.43 eV VB = 2.5 eV, at PZC

BiVO<sub>4</sub>: 2.45eV (I) 2.6 eV (D)

BiVO<sub>4</sub> = 6.04-4.44+2.45/2= 2.83 V

CB=0.38 eV VB=2.83 eV, at PZC

Pzc of BiVO<sub>4</sub> = 3, *Chem. Mater.* **2008**, *20*, 6346–6351,

Pzc of Co<sub>3</sub>O<sub>4</sub> = 7, *Electrochimica Acta*, Vol. 40. No. 16, Pp. 2683-2686, 1995

At pH 7,

BiVO<sub>4</sub>: (3-7)\*0.06 = -0.24 V                      CB = 0.38-0.24=0.14 V, VB = 2.83-0.24=2.59 V

Co<sub>3</sub>O<sub>4</sub>: (7.3-7)\*0.06 = - 0.02 V                      CB = 0.41 V, VB = 2.48 V

Table S1. Comparison of oxygen evolution catalysts

| Catalyst                                                  | Sacrificial agent       | O <sub>2</sub> evolution rate (umol/h/g) | Reference                                                       |
|-----------------------------------------------------------|-------------------------|------------------------------------------|-----------------------------------------------------------------|
| Pt(0.5wt%)-WO <sub>3</sub>                                | 4mM NaIO <sub>3</sub>   | 300                                      | <i>J. Phys. Chem. B</i> <b>2005</b> , <i>109</i> , 16052-16061  |
| WO <sub>3</sub>                                           | 10mM AgNO <sub>3</sub>  | 504                                      | <i>J. Phys. Chem. B</i> <b>2005</b> , <i>109</i> , 16052-16061  |
| Pt(0.5wt%)-BiVO <sub>4</sub>                              | 4mM NaIO <sub>3</sub>   | 88                                       | <i>J. Phys. Chem. B</i> <b>2005</b> , <i>109</i> , 16052-16061  |
| BiVO <sub>4</sub>                                         | 10 mM AgNO <sub>3</sub> | 960                                      | <i>J. Phys. Chem. B</i> <b>2005</b> , <i>109</i> , 16052-16061  |
| BiVO <sub>4</sub> (nanoplate)                             | 0.05M AgNO <sub>3</sub> | 5500                                     | <i>Chem. Commun.</i> , <b>2010</b> , 46, 1893–1895              |
| TaON                                                      | 0.01M AgNO <sub>3</sub> | 3300                                     | <i>Chem. Commun.</i> , <b>2002</b> , 1698–1699                  |
| BiVO <sub>4</sub>                                         | 0.05M AgNO <sub>3</sub> | 421                                      | <i>J. Am. Chem. Soc.</i> <b>1999</b> , <i>121</i> , 11459-11467 |
| BiVO <sub>4</sub>                                         | 0.05M AgNO <sub>3</sub> | 220                                      | <i>Chem. Mater.</i> <b>2001</b> , <i>13</i> , 4624-4628         |
| PbBi <sub>2</sub> Nb <sub>2</sub> O <sub>9</sub> -1wt% Pt | 0.05M AgNO <sub>3</sub> | 520                                      | <i>J. Am. Chem. Soc.</i> <b>2004</b> , <i>126</i> , 8912-8913   |
| TiO <sub>2-x</sub> N <sub>x</sub> -1wt% Pt                | 0.05M AgNO <sub>3</sub> | 221                                      | <i>J. Am. Chem. Soc.</i> <b>2004</b> , <i>126</i> , 8912-8913   |

|                                                                                                                                   |                         |       |                                                                |
|-----------------------------------------------------------------------------------------------------------------------------------|-------------------------|-------|----------------------------------------------------------------|
| N doped TiO <sub>2</sub> -Pt                                                                                                      | AgNO <sub>3</sub>       | 21    | <i>J. Am. Chem. Soc.</i> <b>2004</b> , 126 (29), 8912–8913     |
| PbTiO <sub>3</sub> - Pt                                                                                                           | AgNO <sub>3</sub>       | 523   | <i>J. Solid State Chem.</i> <b>2006</b> , 179 (4), 1214–1218   |
| Sm <sub>2</sub> Ti <sub>2</sub> S <sub>2</sub> O <sub>5</sub> - Pt                                                                | AgNO <sub>3</sub>       | 55    | <i>J. Am. Chem. Soc.</i> <b>2002</b> , 124 (45), 13547–13553   |
| PbBi <sub>4</sub> Ti <sub>4</sub> O <sub>15</sub> - Pt                                                                            | AgNO <sub>3</sub>       | 1443  | <i>J. Solid State Chem.</i> <b>2006</b> , 179 (4), 1214–1218   |
| K <sub>0.5</sub> La <sub>0.25</sub> Bi <sub>0.25</sub> Ca <sub>0.75</sub> Pb <sub>0.75</sub> Nb <sub>3</sub> O <sub>10</sub> - Pt | AgNO <sub>3</sub>       | 560   | <i>J. Solid State Chem.</i> <b>2006</b> , 179 (4), 1214–1218   |
| AgVO <sub>4</sub>                                                                                                                 | AgNO <sub>3</sub>       | 57    | <i>Phys. Chem. Chem. Phys.</i> <b>2003</b> , 5 (14), 3061–3065 |
| Bi <sub>2</sub> MoO <sub>6</sub>                                                                                                  | AgNO <sub>3</sub>       | 110   | <i>J. Phys. Chem. B</i> <b>2006</b> , 110 (36), 17790–17797    |
| Cr:PbMoO <sub>4</sub>                                                                                                             | AgNO <sub>3</sub>       | 143   | <i>J. Chem. Soc. Jpn.</i> <b>2007</b> , 80 (5), 885–893        |
| Ta <sub>3</sub> N <sub>5</sub> -Pt                                                                                                | AgNO <sub>3</sub>       | 500   | <i>Chem. Lett.</i> <b>2002</b> , (7), 736–737                  |
| Y <sub>2</sub> Ta <sub>2</sub> O <sub>5</sub> N <sub>2</sub>                                                                      | AgNO <sub>3</sub>       | 467   | <i>Chem. Commun.</i> <b>2004</b> , (19), 2192–2193             |
| BiVO <sub>4</sub> -Co <sub>3</sub> O <sub>4</sub>                                                                                 | 0.02M NaIO <sub>4</sub> | 11000 | N/A                                                            |

#### Brief calculation of sun light intensity

The location of Davis, CA is 38°33' N, 121°44' W and the experiment was conducted between 11 am to 5 pm on Oct. 31, 2014. The cosine of solar zenith angle is calculated to be 0.4854 by Solar Position Calculator (shown below), provided by U.S. Department of Commerce, National Oceanic & Atmospheric Administration (NOAA), Earth System Research Laboratory (ESRL) from website <http://www.esrl.noaa.gov/gmd/grad/solcalc/sollinks.html>.

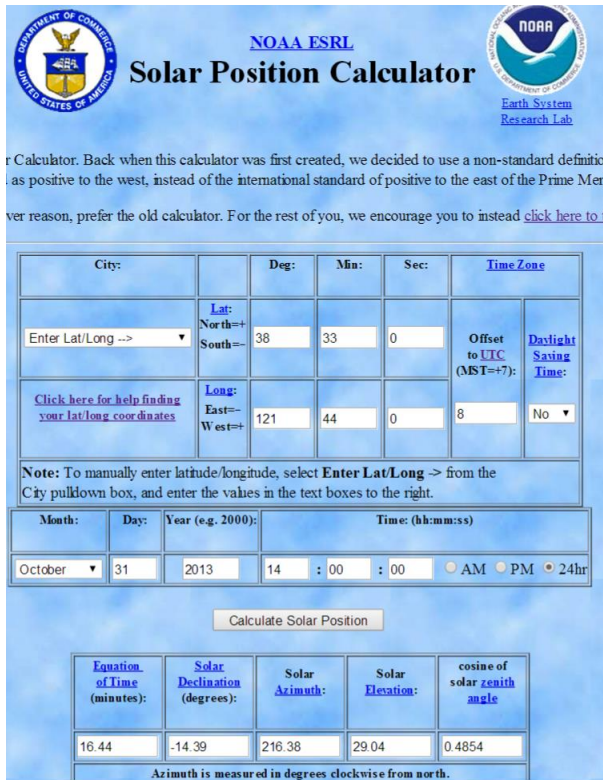

NOAA ESRL  
Solar Position Calculator

Earth System Research Lab

Calculator. Back when this calculator was first created, we decided to use a non-standard definition of longitude as positive to the west, instead of the international standard of positive to the east of the Prime Meridian. For the sake of consistency, we will continue to use the old definition. For the rest of you, we encourage you to instead [click here to try the new calculator](#).

City:  Deg:  Min:  Sec:  Time Zone:

Enter Lat/Long -->  Lat: North --+  South --=  Deg:  Min:  Sec:  Offset to UTC (MST=+7):  Daylight Saving Time:

[Click here for help finding your lat/long coordinates](#) Long: East --+  West --+  Deg:  Min:  Sec:  Offset to UTC (MST=+7):  Daylight Saving Time:

Note: To manually enter latitude/longitude, select **Enter Lat/Long -->** from the City pulldown box, and enter the values in the text boxes to the right.

Month:  Day:  Year (e.g. 2000):  Time (hh:mm:ss):  :  :   AM  PM  24hr

October 31 2013 14 : 00 : 00 AM PM 24hr

Calculate Solar Position

| Equation of Time (minutes): | Solar Declination (degrees): | Solar Azimuth: | Solar Elevation: | cosine of solar zenith angle |
|-----------------------------|------------------------------|----------------|------------------|------------------------------|
| 16.44                       | -14.39                       | 216.38         | 29.04            | 0.4854                       |

Azimuth is measured in degrees clockwise from north.

$$AM = 1/\cos(z) = 1/0.4854 = 2.06$$

Based on the equation of direct solar irradiation,

$$I_D = 1.353 \cdot 0.7(AM^{0.678})$$

The direct solar irradiation intensity is calculated to be  $0.76 \text{ kW/m}^2 = 760 \text{ mW/cm}^2$

Meinel, A. B. and Meinel, M. P., *Applied Solar Energy*. Addison Wesley Publishing Co.; 1976.
